# Supplementary figures and images for: Predictive nonlinear modeling of malignant myelopoiesis and tyrosine kinase inhibitor therapy
Source: eLife journal article supplement (doi:10.7554/elife.84149), 2023-04-28

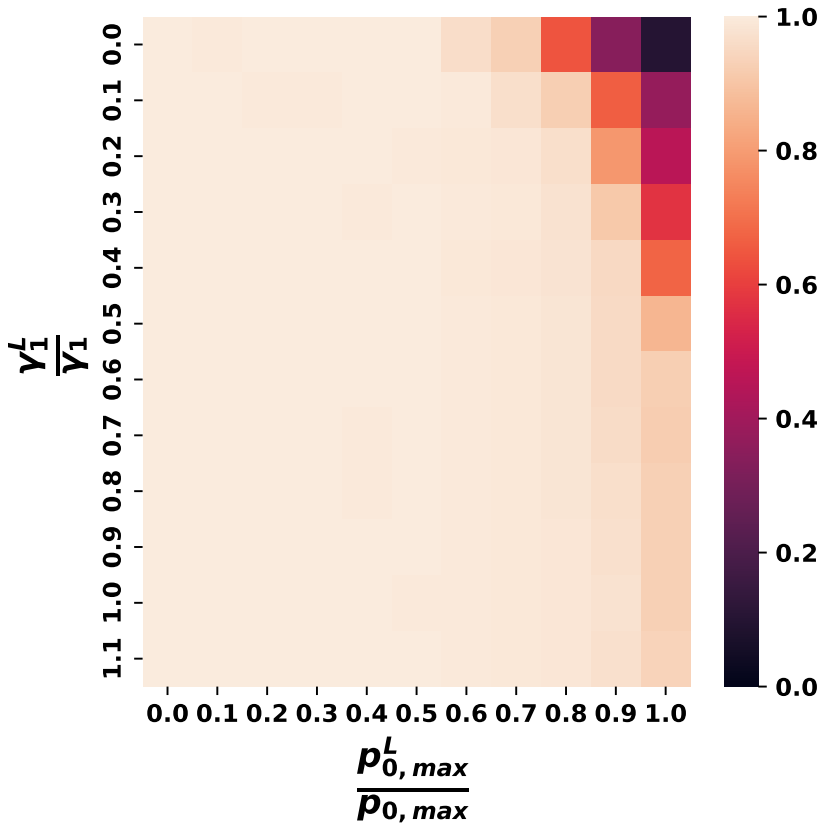

Supplement: supp [file elife-84149-supp-v3.zip]

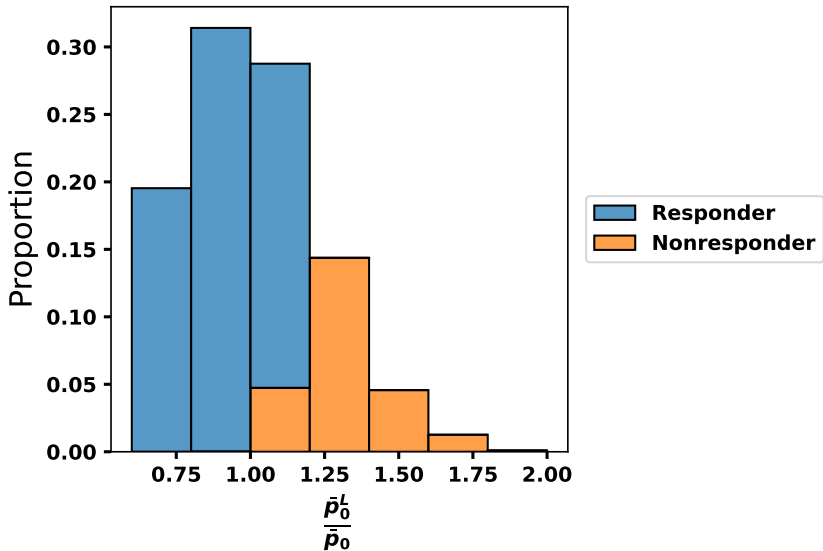

Supplement: supp [file elife-84149-supp-v3.zip]

$\gamma_{4,L}$  Perturbation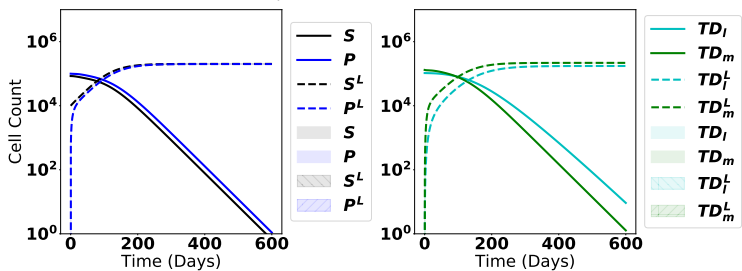 $\gamma_{5,L}$  Perturbation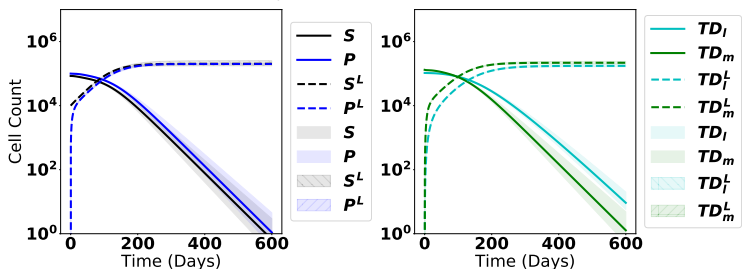 $TKI_{HSC}$  Perturbation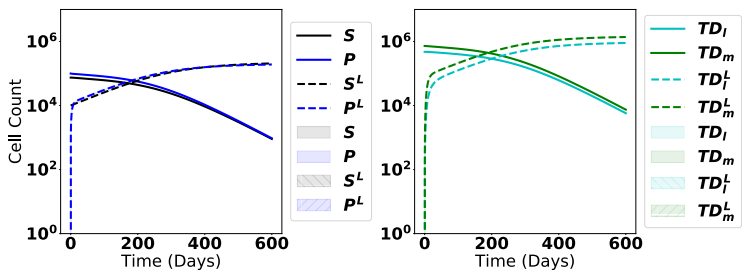 $TKI_{MPP}$  Perturbation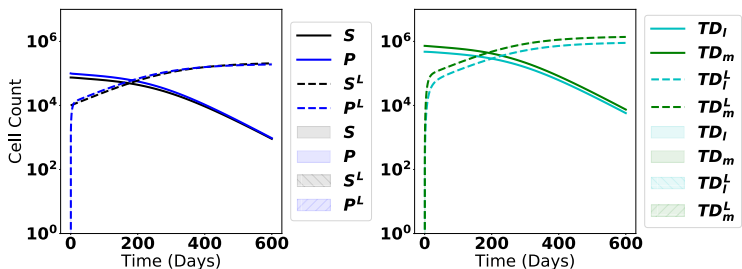

Supplement: supp [file elife-84149-supp-v3.zip]

$p_{0,max}$  Perturbation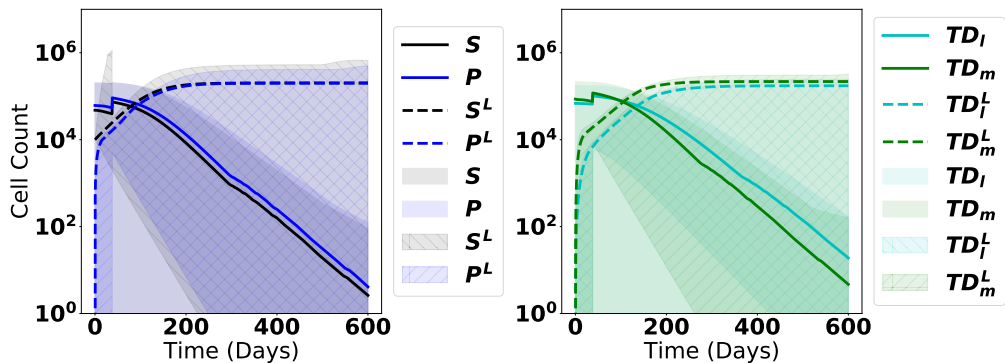 $p_{1,max}$  Perturbation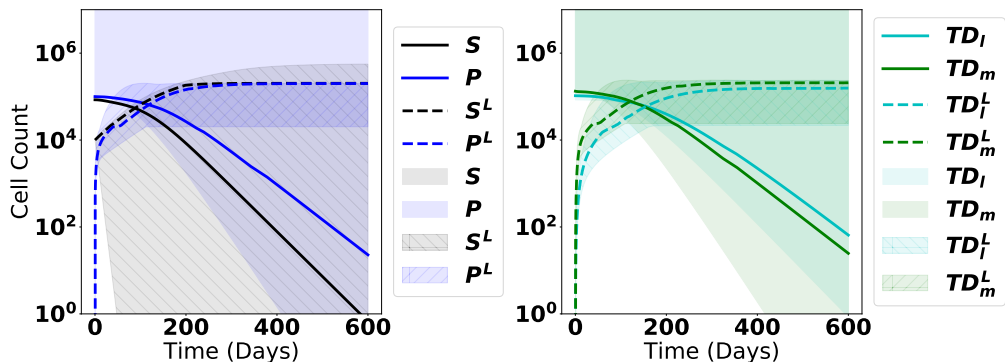 $q_{1,max}$  Perturbation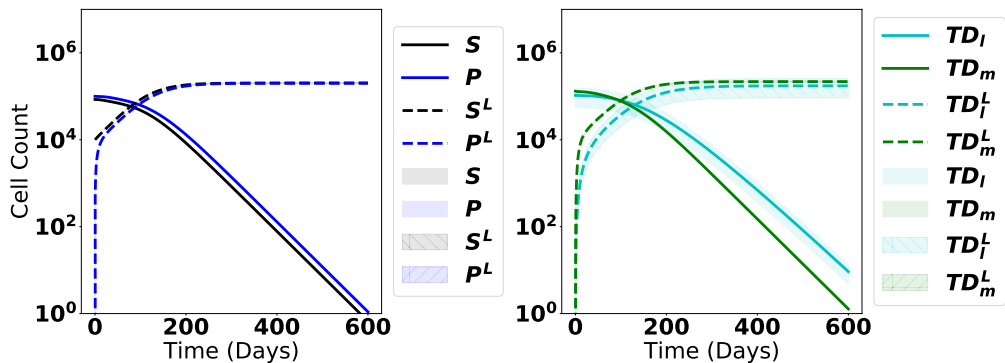

Supplement: supp [file elife-84149-supp-v3.zip]

HSC Transplant

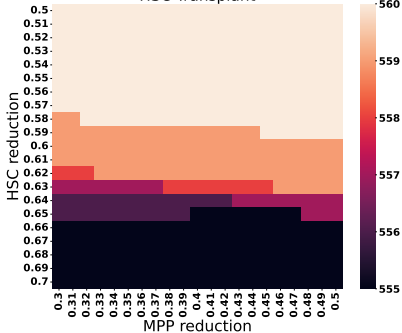

MPP Transplant

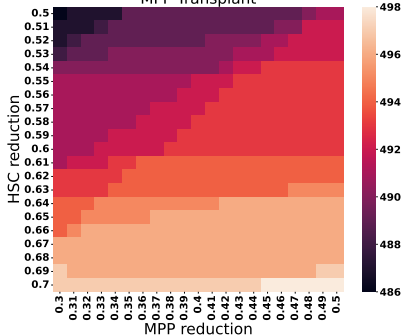

Supplement: supp [file elife-84149-supp-v3.zip]

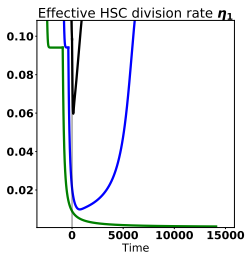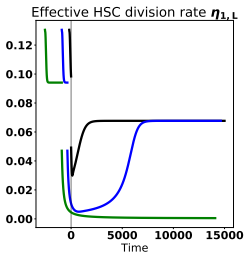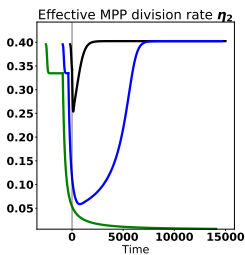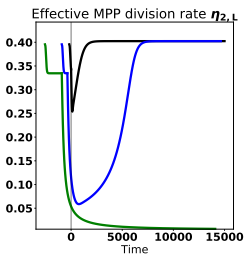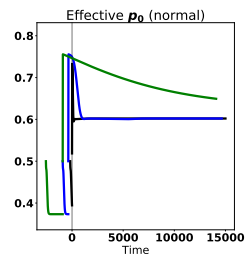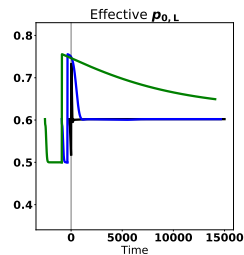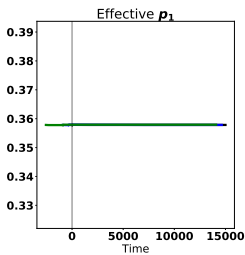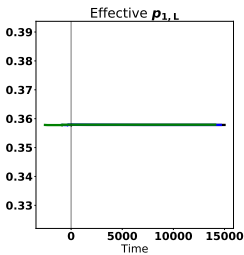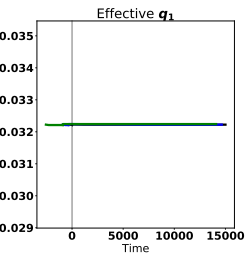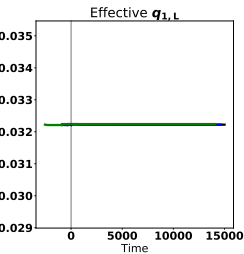

Supplement: supp [file elife-84149-supp-v3.zip]

$\eta_{1,max}$  Perturbation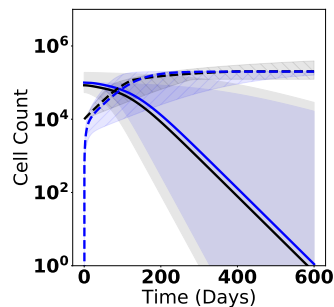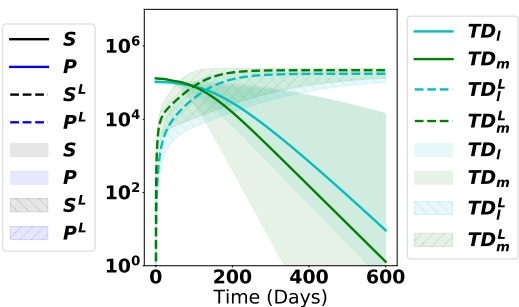 $\eta_{2,max}$  Perturbation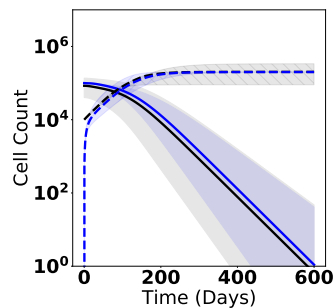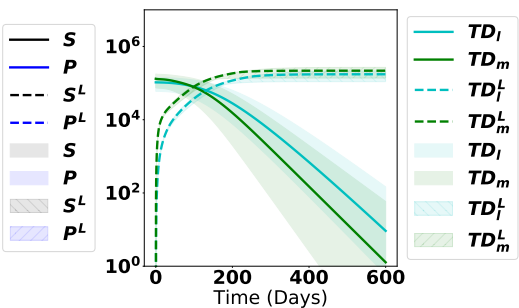 $\gamma_1$  Perturbation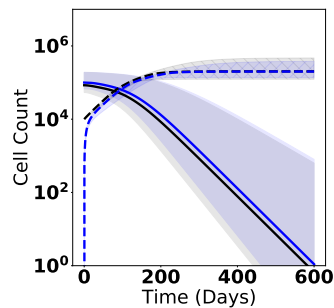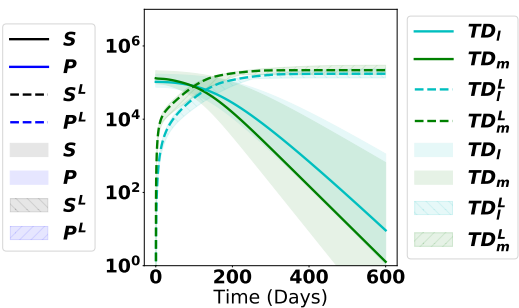 $\gamma_2$  Perturbation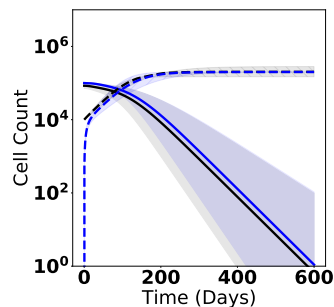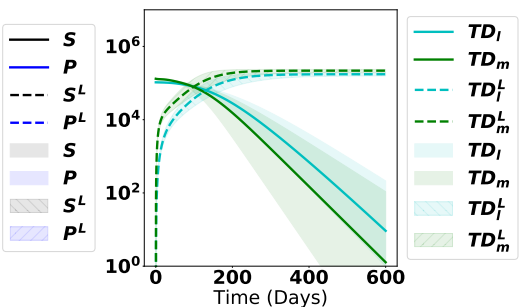

Supplement: supp [file elife-84149-supp-v3.zip]

HSC Transplant

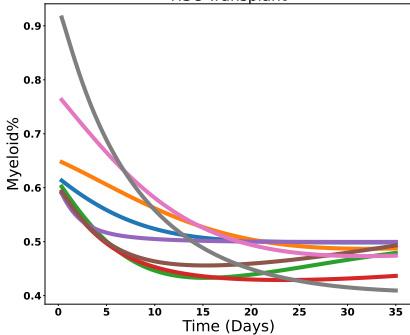

MPP Transplant

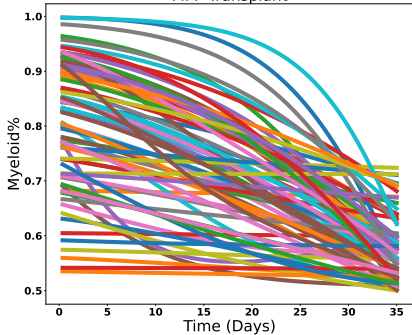

Supplement: supp [file elife-84149-supp-v3.zip]

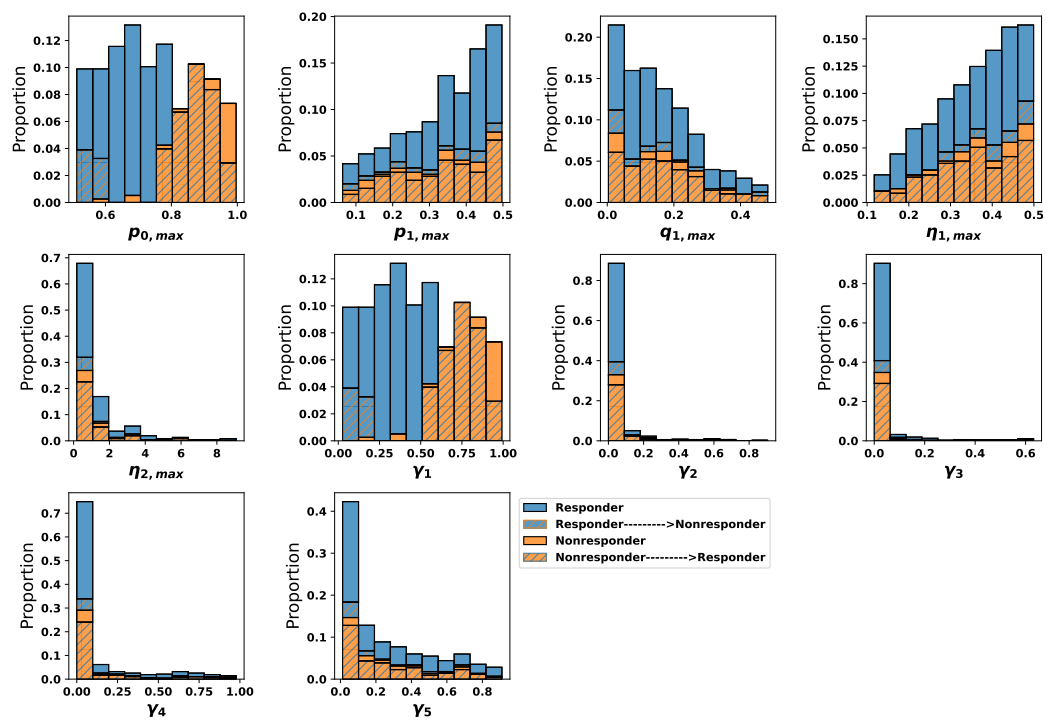

Supplement: supp [file elife-84149-supp-v3.zip]

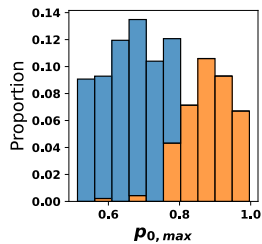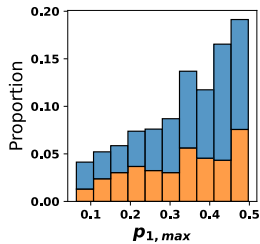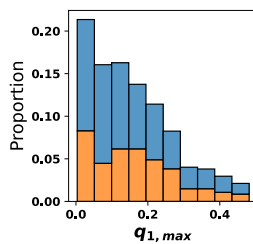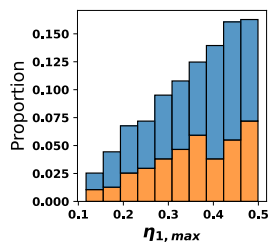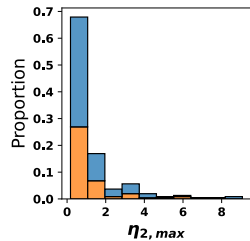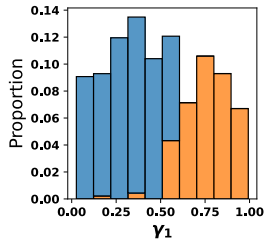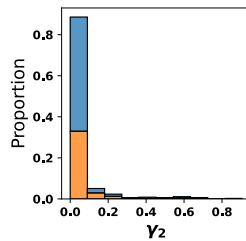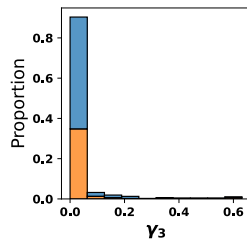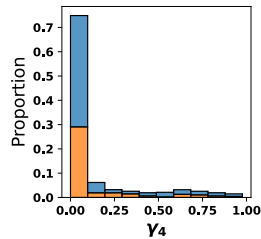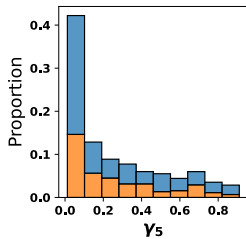

Responder  
Nonresponder

Supplement: supp [file elife-84149-supp-v3.zip]

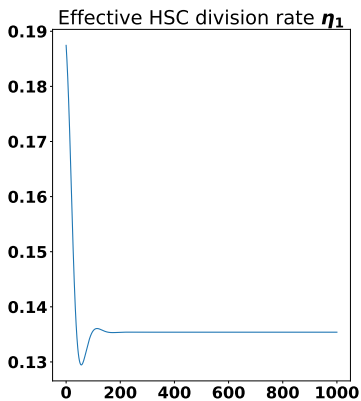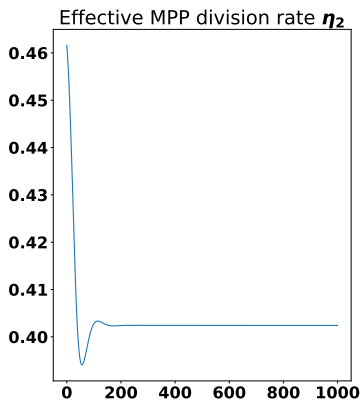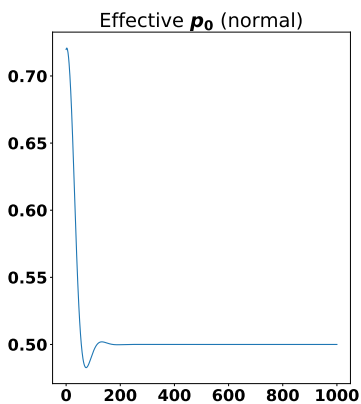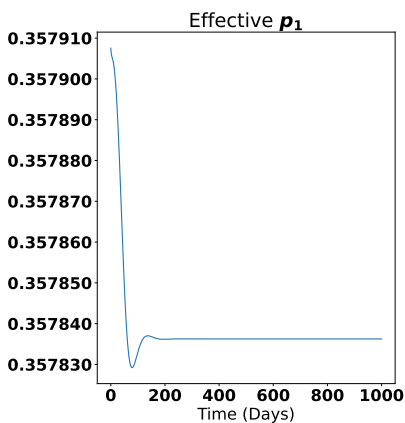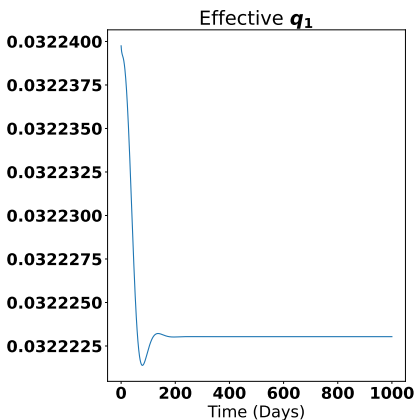

Supplement: supp [file elife-84149-supp-v3.zip]

$d_M$  Perturbation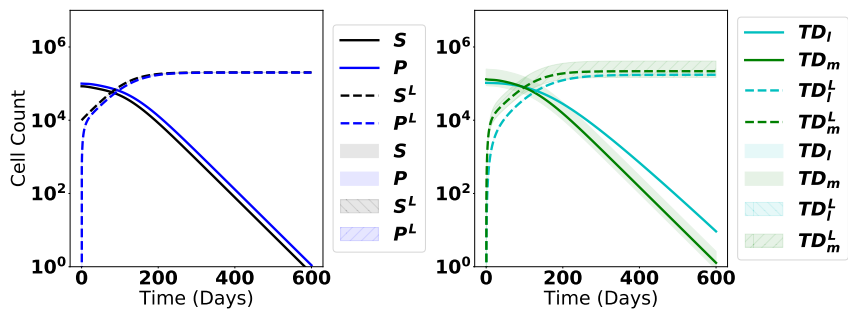 $\gamma_{1,L}$  Perturbation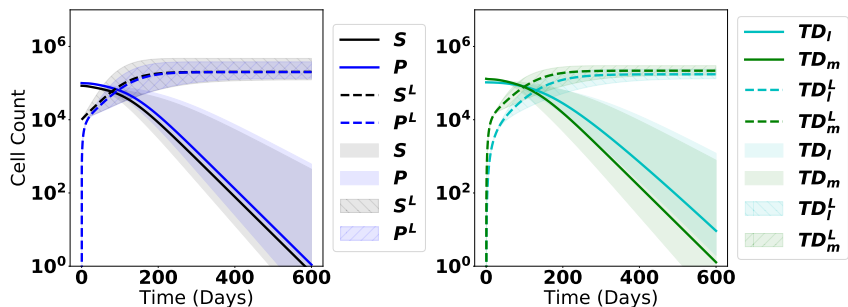 $\gamma_{2,L}$  Perturbation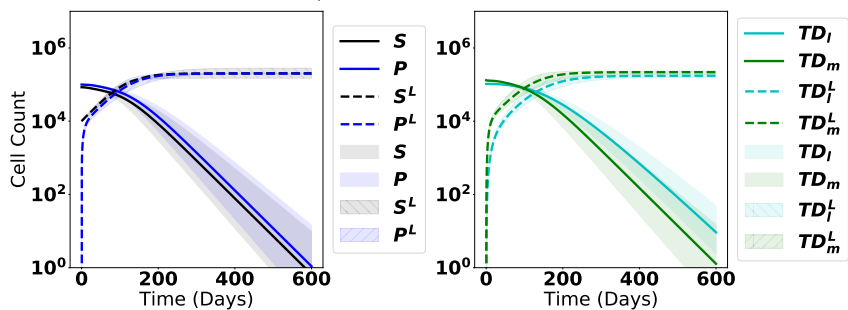 $\gamma_{3,L}$  Perturbation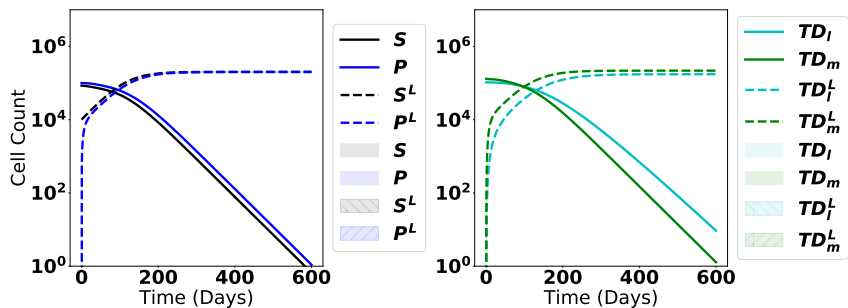

Supplement: supp [file elife-84149-supp-v3.zip]

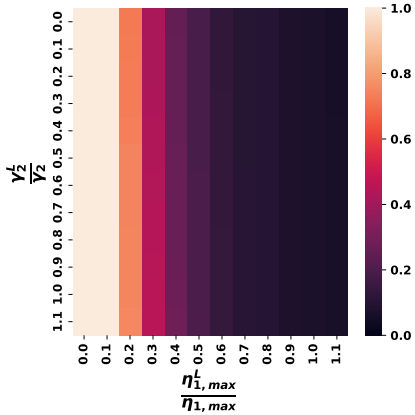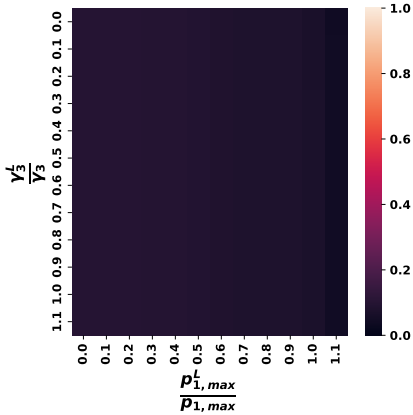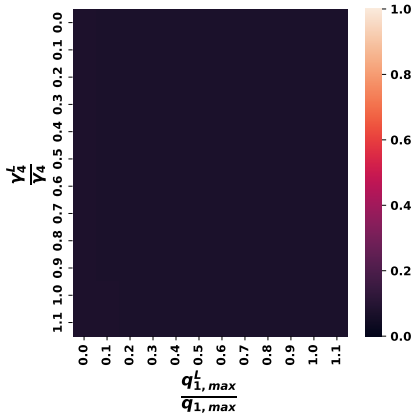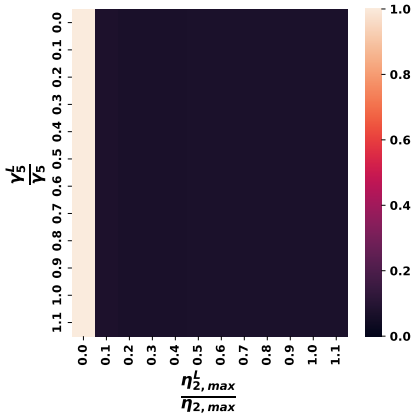

Supplement: supp [file elife-84149-supp-v3.zip]

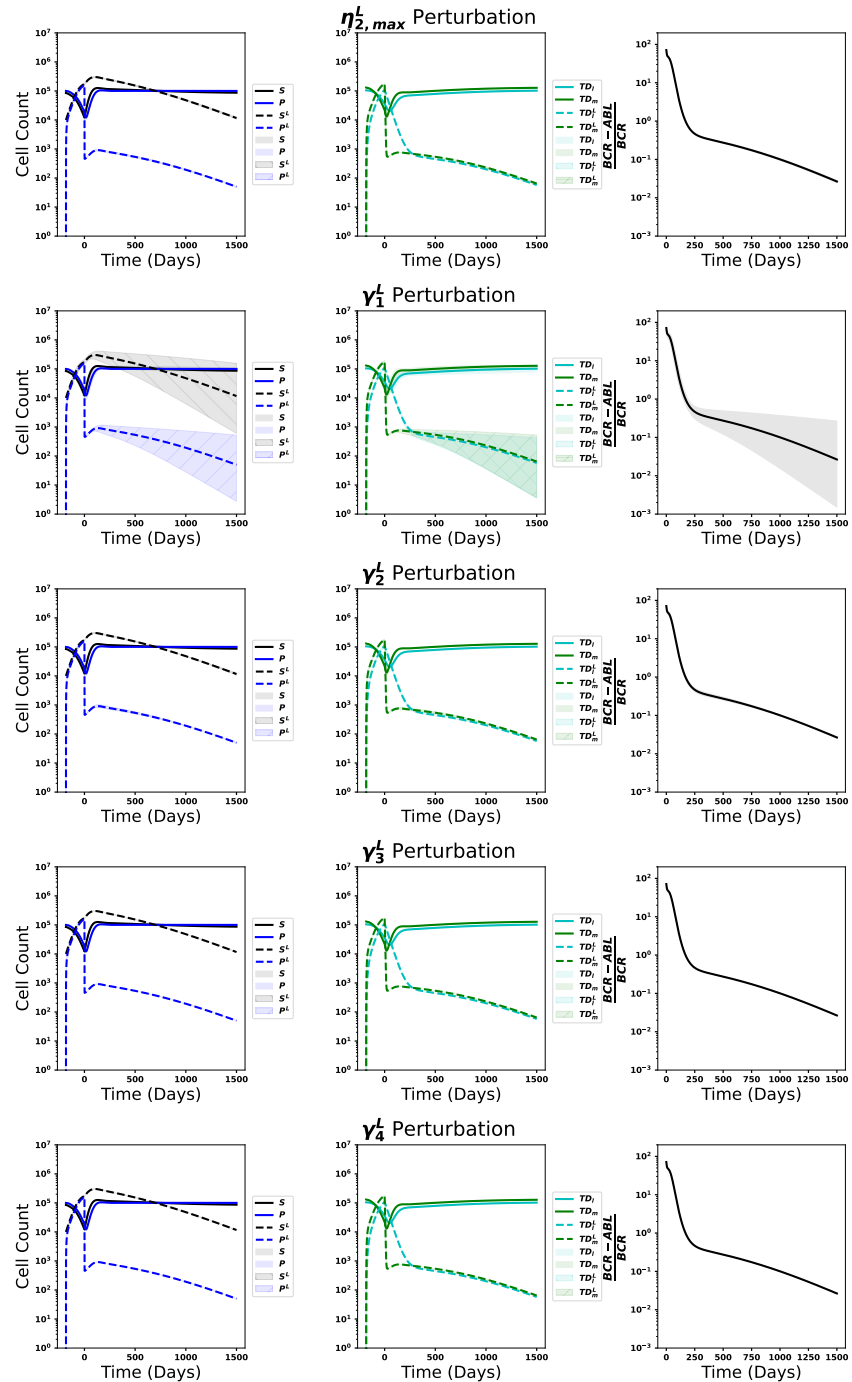

Supplement: supp [file elife-84149-supp-v3.zip]

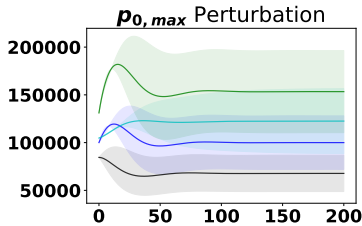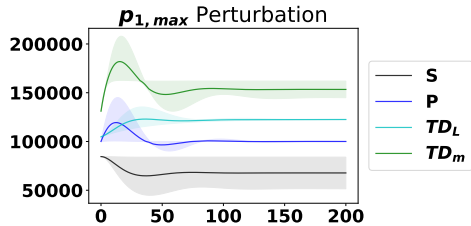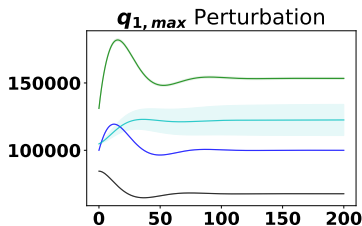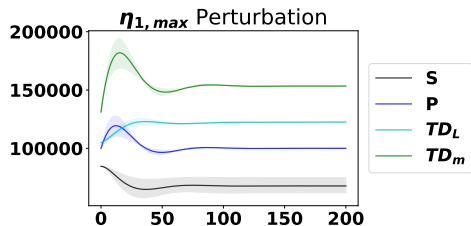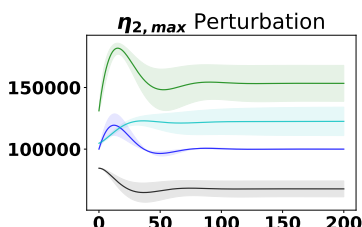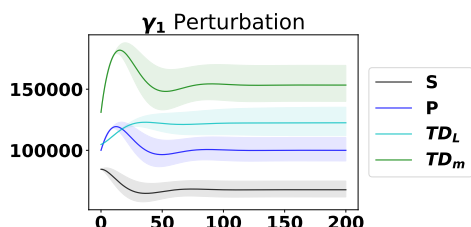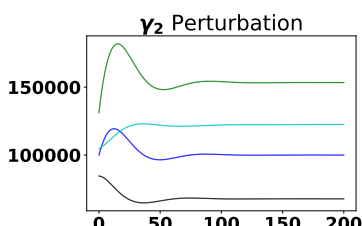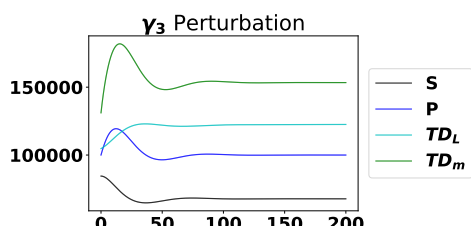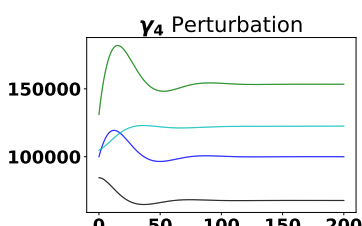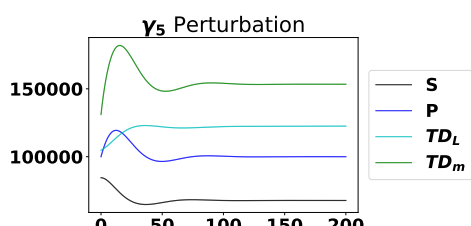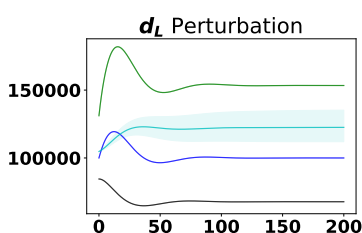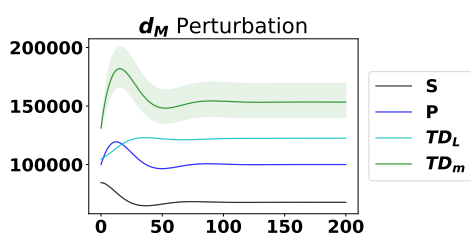

Supplement: supp [file elife-84149-supp-v3.zip]

$\gamma_3$  Perturbation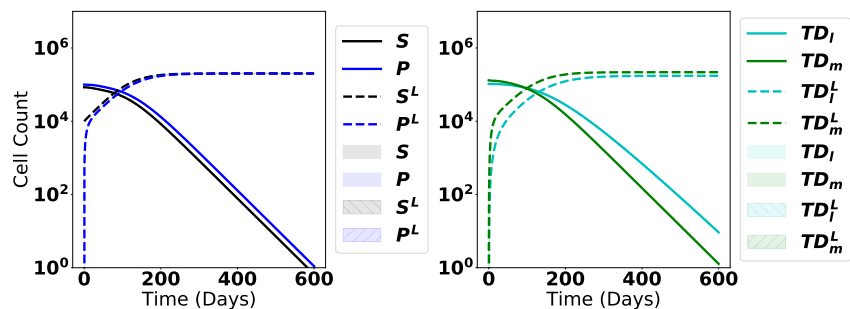 $\gamma_4$  Perturbation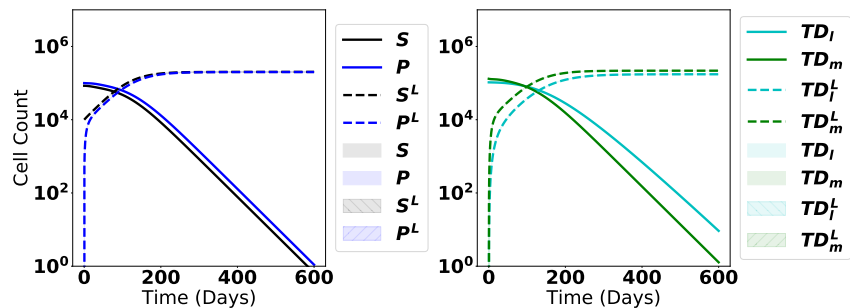 $\gamma_5$  Perturbation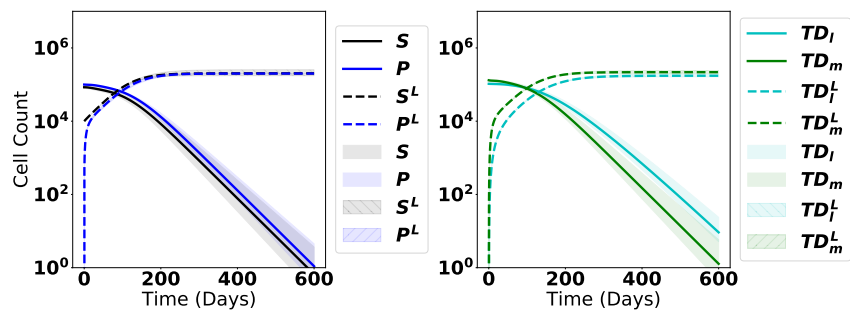 $d_L$  Perturbation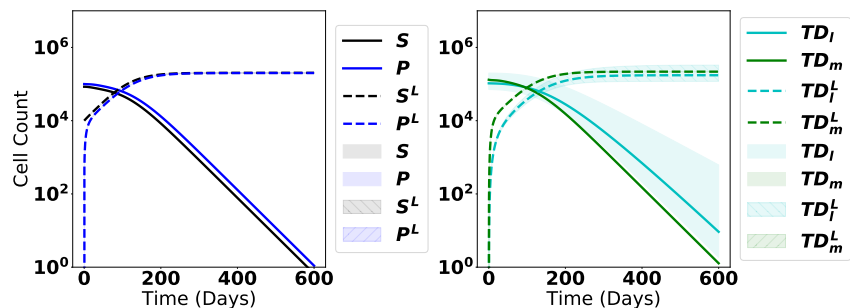

Supplement: supp [file elife-84149-supp-v3.zip]

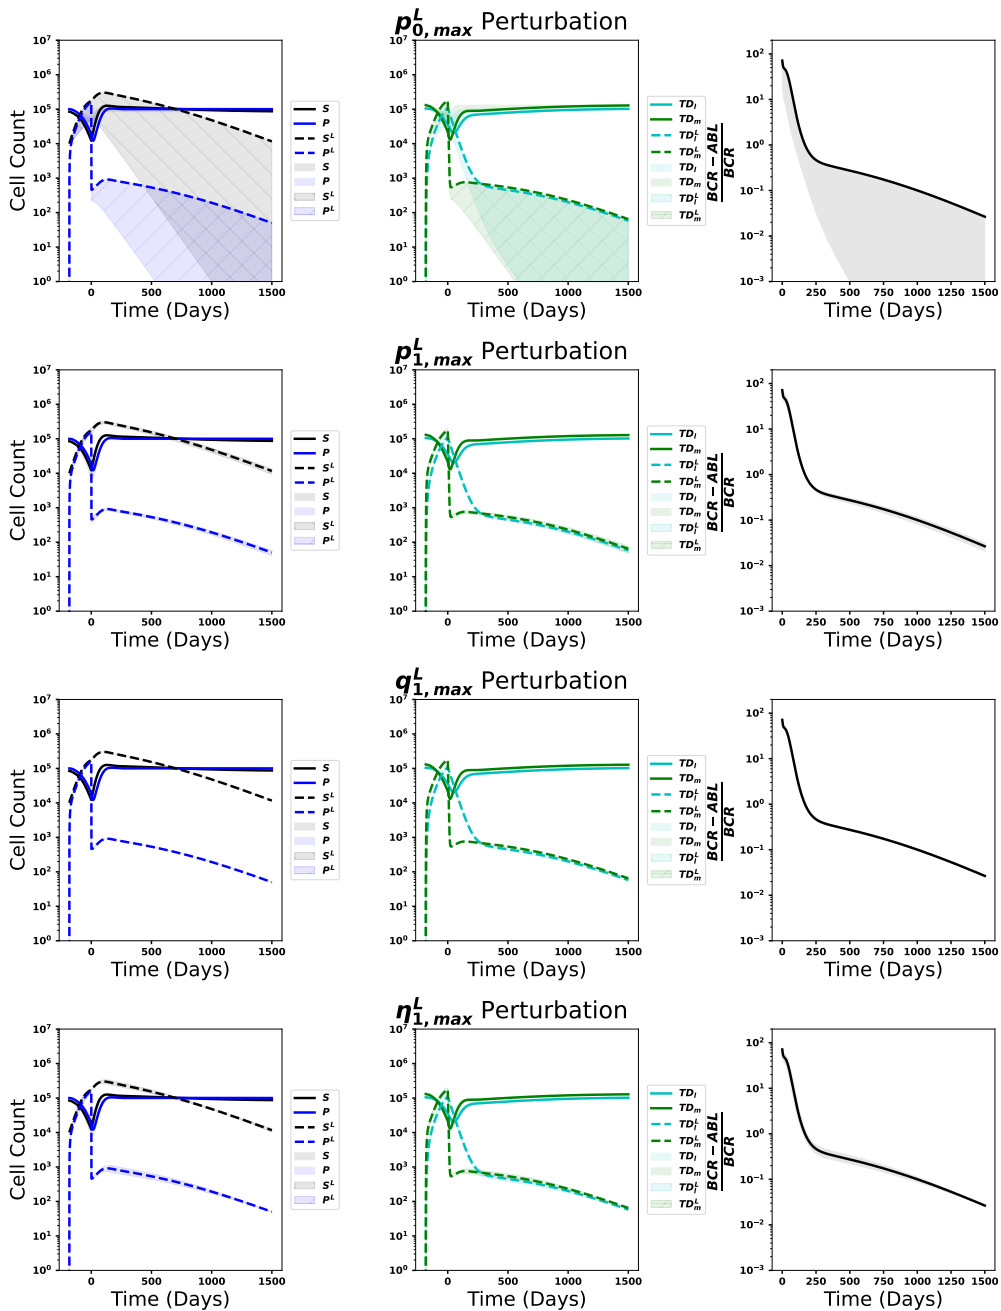

Supplement: supp [file elife-84149-supp-v3.zip]

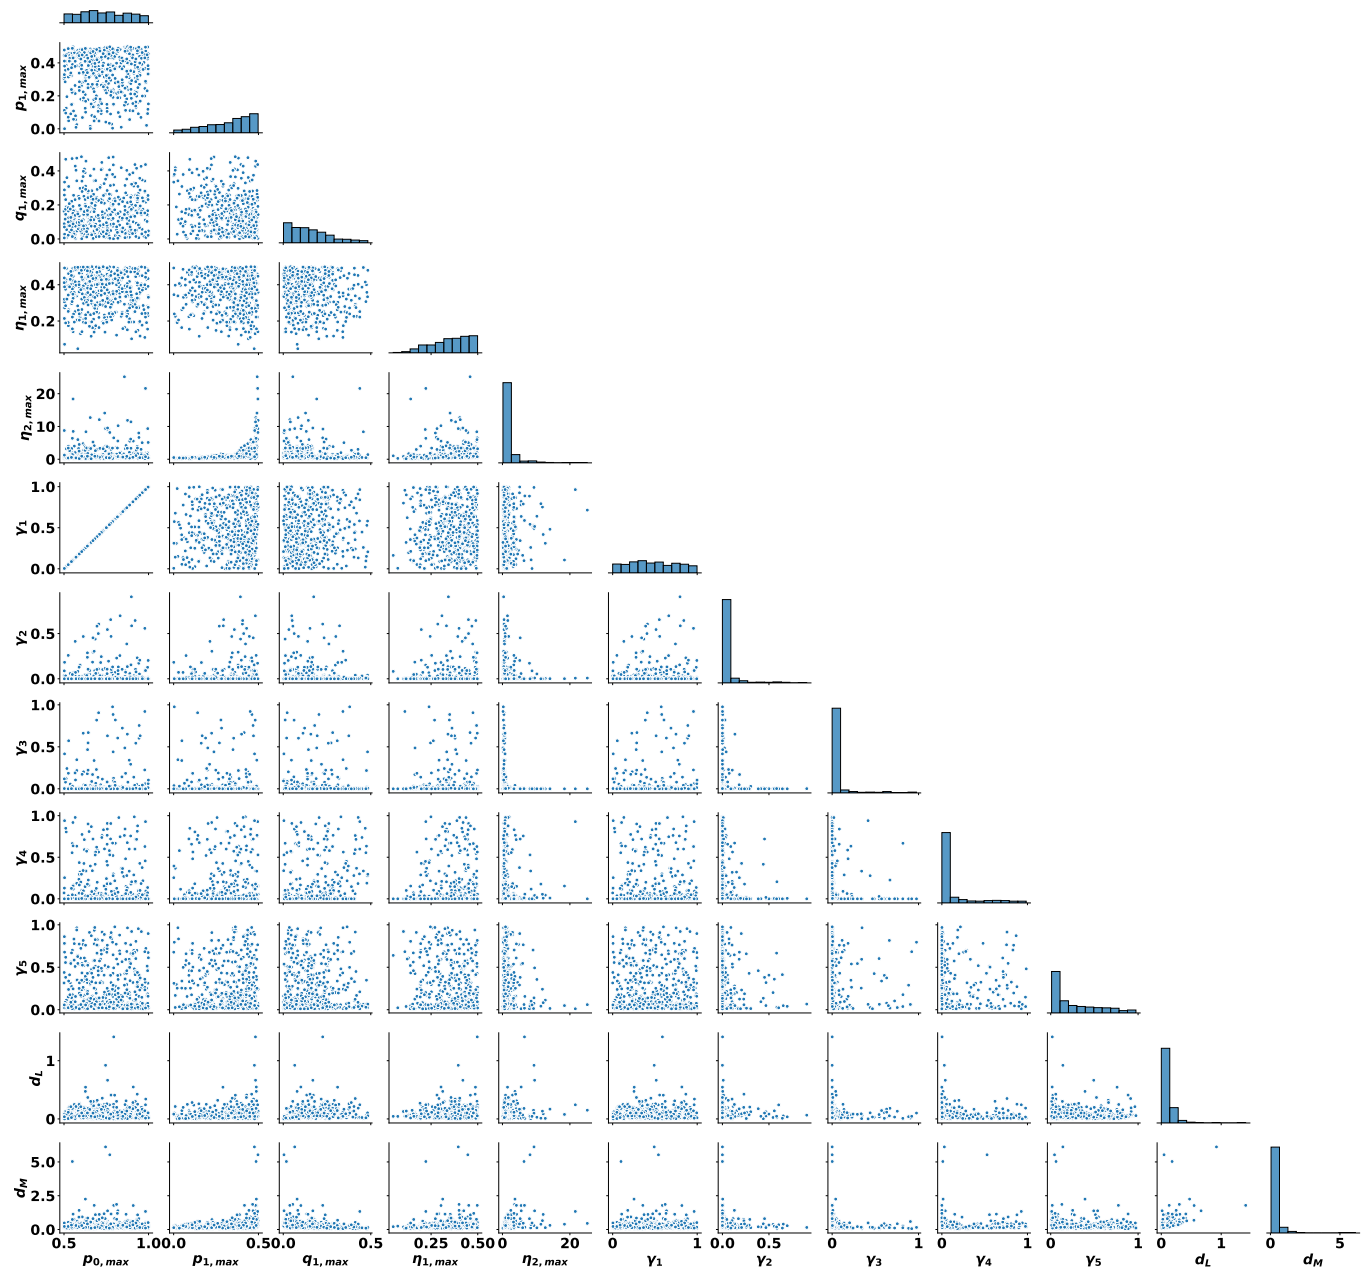

Supplement: supp [file elife-84149-supp-v3.zip]
